# Supplementary material
Source: publisher site journal article supplement (https://www.dovepress.com/get_supplementary_file.php?f=215478-English.xlsx)
Supplement: Supplementary file 1 [file get_supplementary_file.php]

## Sheet: English version
12-item questionnaire for depressive mixed state (DMX-12)
Day： Month： Year： Name：
◆Please answer to the following questions, asking about your recent mood and behavior.（0：never，1：sometimes，2：often，3：always）			never				sometimes				often				always
1	I am more sensitive and vulnerable than usual to others' comments and attitudes.	0 － 1 － 2 － 3
2	I tend to overreact to trivial things more than usual.	0 － 1 － 2 － 3
3	I am easily distracted and unable to focus completely on a task.	0 － 1 － 2 － 3
4	My mood changes rapidly in a short time.	0 － 1 － 2 － 3
5	I feel so tense that I am unable to relax.	0 － 1 － 2 － 3
6	I get overwhelmed by unpleasant and displeasing feelings.	0 － 1 － 2 － 3
7	Many different thoughts run through my head rapidly and fruitlessly.	0 － 1 － 2 － 3
8	I feel restless and unable to stay still.	0 － 1 － 2 － 3
9	I feel like acting impulsively with no regard for consequences.	0 － 1 － 2 － 3
10	I get easily irritated for no reason.	0 － 1 － 2 － 3
11	When someone disagrees with me, I feel like quarrelling with or hitting that person.	0 － 1 － 2 － 3
12	I tend to deliberately take risks.	0 － 1 － 2 － 3
